# Supplementary material
Source: publisher site journal article supplement (https://www.dovepress.com/article/361045)
Supplement: Supplementary file 1 [file get_supplementary_file.php]

**Supplementary Table 1. Patient characteristics according to metastatic burden**

| **Variables** | **Extensive metastasis**  **(≥5 lesions) (n=51)** | | | **Oligometastasis**  **(<5 lesions) (n=7)** | | ***p* value** |
| --- | --- | --- | --- | --- | --- | --- |
| **Number of patients (%)** | | | | |
| **Age (years)** | Median 60  (range, 29-84) | | | Median 49  (range, 42-68) | | 0.351 |
| **Sex** |  | |  |  |  | 0.411 |
| Male | 48 (94.4) | | | 6 (85.7) | |  |
| Female | 3 (5.9) | | | 1 (14.3) | |  |
| **HCC etiology** |  | |  |  |  | 0.805 |
| B-viral | 48 (94.1) | | | 7 (100) | |  |
| C-viral | 2 (3.9) | | | 0 (0) | |  |
| Others | 1 (2.0) | | | 0 (0) | |  |
| **Liver cirrhosis** |  | |  |  |  | 0.123 |
| Yes | 42 (82.4) | | | 4 (57.1) | |  |
| No | 9 (17.6) | | | 3 (42.9) | |  |
| **Child-Pugh grade** |  | |  |  |  | 0.814 |
| A | 30 (58.8) | | | 5 (71.4) | |  |
| B | 11 (21.6) | | | 1 (14.3) | |  |
| C | 10 (19.6) | | | 1 (14.3) | |  |
| **Time interval between initial HCC diagnosis and SBM (months)** | Median 15.5  (range, 0-140) | | | Median 24  (range, 2-45) | | 0.428 |
| **Tumor size**  **(cm, in longest diameter)** | Median 3.3  (range, 1.1-7.9) | | | Median 2.6  (range, 1.5-3.5) | | 0.447 |
| **AFP (ng/ml)** | Median 521.2  (range, 2.58-149,211) | | | Median 359.35  (range, 4.3-100,000) | | 0.493 |
| **PIVKA-II (mAU/ml)** | Median 2000  (range, 17-75,000) | | | Median 3156  (range, 131-59,021) | | 0.101 |
| **Status of primary liver tumor** |  |  | |  |  | 0.347 |
| PD | 34 (66.7) | | | 3 (42.9) | |  |
| SD | 12 (23.5) | | | 2 (28.6) | |  |
| PR | 1 (2.0) | | | 0 (0) | |  |
| CR | 4 (7.8) | | | 2 (28.6) | |  |
| **8th AJCC stage of primary tumor** |  | | |  | | 0.85 |
| T0N0 | 4 (7.8) | | | 2 (28.6) | |  |
| T1N0 | 4 (7.8) | | | 1 (14.3) | |  |
| T2N0 | 4 (7.8) | | | 1 (14.3) | |  |
| T3aN0 | 1 (2.0) | | | 0 (0) | |  |
| T3bN0 | 13 (25.5) | | | 2 (28.6) | |  |
| T4N0 | 0 (0) | | | 0 (0) | |  |
| N1 | 25 (49.0) | | | 1 (14.3) | |  |

*Abbreviations: HCC, hepatocellular carcinoma; AFP, alpha-feto protein; PIVKA-II, prothrombin-induced by vitamin K absence or antagonist-II; PD, progressive disease; SD, stable disease; PR, partial response; CR, complete response, AJCC; American Joint Committee on Cacner

**Supplementary Table 2. Patient characteristics according to the BED**

| **Variables** | **BED ≥ 50Gy (n=21)** | **BED < 50Gy (n=18)** | **No RT (n=19)** | | ***p* value** |
| --- | --- | --- | --- | --- | --- |
|
| **No of patients (%)** | | | |  |
| **Age (years)** | Median 61 (range, 32-84) | Median 56  (range, 29-73) | | Median 60, (range, 45-72) | 0.726† |
| **Sex** |  |  | |  | 0.148 |
| Male | 20 (95.2) | 18 (100) | | 16 (84.2) |  |
| Female | 1 (4.8) | 0 (0) | | 3 (15.8) |  |
| **HCC etiology** |  |  | |  | 0.575 |
| B-viral | 20 (95.2) | 17 (94.5) | | 18 (94.7) |  |
| C-viral | 0 (0) | 1 (5.5) | | 1 (5.3) |  |
| Others | 1 (4.8) | 0 (0) | | 0 (0) |  |
| **Liver cirrhosis** |  |  | |  | 0.97 |
| Yes | 17 (81.0) | 14 (77.8) | | 15 (78.9) |  |
| No | 4 (19.0) | 4 (22.2) | | 4 (21.1) |  |
| **Child-Pugh grade** |  |  | |  | 0.107 |
| A | 17 (76.2) | 9 (50.0) | | 9 (47.4) |  |
| B | 2 (14.3) | 6 (33.3) | | 4 (21.1) |  |
| C | 2 (9.5) | 3 (16.7) | | 6 (31.6) |  |
| **Metastatic burden** |  |  | |  | 0.118 |
| Oligometastasis  (<5 lesions) | 5 (23.8) | 1 (5.5) | | 1 (5.3) |  |
| Extensive metastasis  (≥5 lesions) | 16 (76.2) | 17 (94.5) | | 18 (94.7) |  |
| **Time interval between initial HCC diagnosis and SBM (months)** | Median 21 (range, 0-92) | Median 10  (range, 0-104) | | Median 38 (range, 0-140) | 0.111† |
| **Tumor size (cm, in longest diameter)** | Median 3.4 (range, 1.5-5.5) | Median 3.3  (range, 1.9-5.0) | | Median 2.8 (range, 1.1-7.9) | 0.557† |
|  |
| **AFP (ng/ml)** | Median 271.96 (range, 3.49-100,000) | Median 1524.76 (range, 2.58-120,000) | | Median 573.3 (range, 2.94-149,211.42) | 0.958† |
|  |
| **PIVKA-II (mAU/ml)** | Median 2000 (range, 94-75,000) | Median 2000 (range, 21-75,000) | | Median 2000 (range, 17-75,000) | 0.759† |
|  |
| **Status of primary liver tumor** |  |  | |  | 0.796 |
| PD | 13 (61.9) | 13 (72.2) | | 11 (57.9) |  |
| SD | 5 (23.8) | 4 (22.2) | | 5 (26.3) |  |
| PR | 1 (4.8) | 0 (0) | | 0 (0) |  |
| CR | 2 (9.5) | 1 (5.5) | | 3 (15.8) |  |
| **8th AJCC stage of primary tumor** |  |  | |  | 0.284 |
| T0N0 | 2 (9.5) | 1 (5.5) | | 3 (15.8) |  |
| T1N0 | 0 (0) | 2 (11.1) | | 3 (15.8) |  |
| T2N0 | 2 (9.5) | 0 (0) | | 3 (15.8) |  |
| T3aN0 | 0 (0) | 1 (5.5) | | 0 (0) |  |
| T3bN0 | 6 (28.6) | 4 (22.2) | | 5 (26.3) |  |
| T4N0 | 0 (0) | 0 (0) | | 0 (0) |  |
| N1 | 11 (52.4) | 10 (55.6) | | 5 (26.3) |  |

*Abbreviations: BED, biologically effective dose; HCC, hepatocellular carcinoma; SBM, skull base metastasis; AFP, alpha-feto protein; PIVKA-II, prothrombin-induced by vitamin K absence or antagonist-II; PD, progressive disease; SD, stable disease; PR, partial response; CR, complete response, AJCC; American Joint Committee on Cacner

†For numerical variables, one-way analysis of variance (ANOVA) method was used to compare means across 3 groups. P value for each variables was calculated after Levene’s test for equality of variances.

**Supplementary Table 3. Treatment characteristics and response rates according to metastatic burden**

| **Variables** | **Extensive metastasis**  **(≥5 lesions)** | | | **Oligometastasis**  **(< 5 lesions)** | | ***p* value** |
| --- | --- | --- | --- | --- | --- | --- |
| **No. of patients (%)** | | | | |
| **Treatments for SBM** |  |  | |  |  | 0.403 |
| RT alone | 24 (47.1) | | | 4 (57.1) | |  |
| RT + Systemic agents | 6 (11.8) | | | 2 (28.6) | |  |
| Surgery + RT | 3 (5.9) | | | 0 (0) | |  |
| Systemic agent alone | 4 (7.8) | | | 1 (14.3) | |  |
| None | 14 (27.5) | | | 0 (0) | |  |
| **RT modality** |  |  | |  |  | 0.631 |
| Conventional RT  (fx size <5 Gy) | 18 (54.5) | | | 2 (33.3) | |  |
| Hypofractionated RT or stereotactic radiosurgery  (fx size ≥5 Gy) | 11 (33.3) | | | 3 (50.0) | |  |
| Gamma knife surgery | 4 (12.1) | | | 1 (16.7) | |  |
| **RT dose (Gy)** | Median 30  (range, 9-60) | | | Median 52   (range, 27-60) | | 0.476 |
|
| **RT dose in BED (Gy)** | Median 45.6  (range, 28-150.0) | | | Median 78   (range, 39-99.9) | | 0.213 |
|
| **Fraction number** | Median 10   (range, 1-15) | | | Median 10   (range, 1-20) | | 0.651 |
|
| **Local response**  **(1 month after RT)** |  | |  |  |  | 0.709 |
| CR/PR/SD | 15 (62.5) | | | 4 (66.7) | |  |
| PD | 9 (37.5) | | | 2 (33.3) | |  |
| **Local treatment for viable primary liver tumor** |  | | |  | | 0.123 |
| None | 42 (82.4) | | | 4 (66.7) | |  |
| TACE | 5 (9.8) | | | 2 (33.3) | |  |
| RT | 4 (7.8) | | | 1 (16.7) | |  |

*Abbreviations: SBM, skull base metastasis; RT, radiation therapy; fx, fraction; SRS, stereotactic radiosurgery; BED, biologically effective dose; CR, complete response; PR, partial response; SD, stable disease; PD, progressive disease

**Supplementary figure 1. Survival analysis according to BED among patients who received radiation therapy; (a) in the full metastasis group and (b) in the oligometastasis group.**


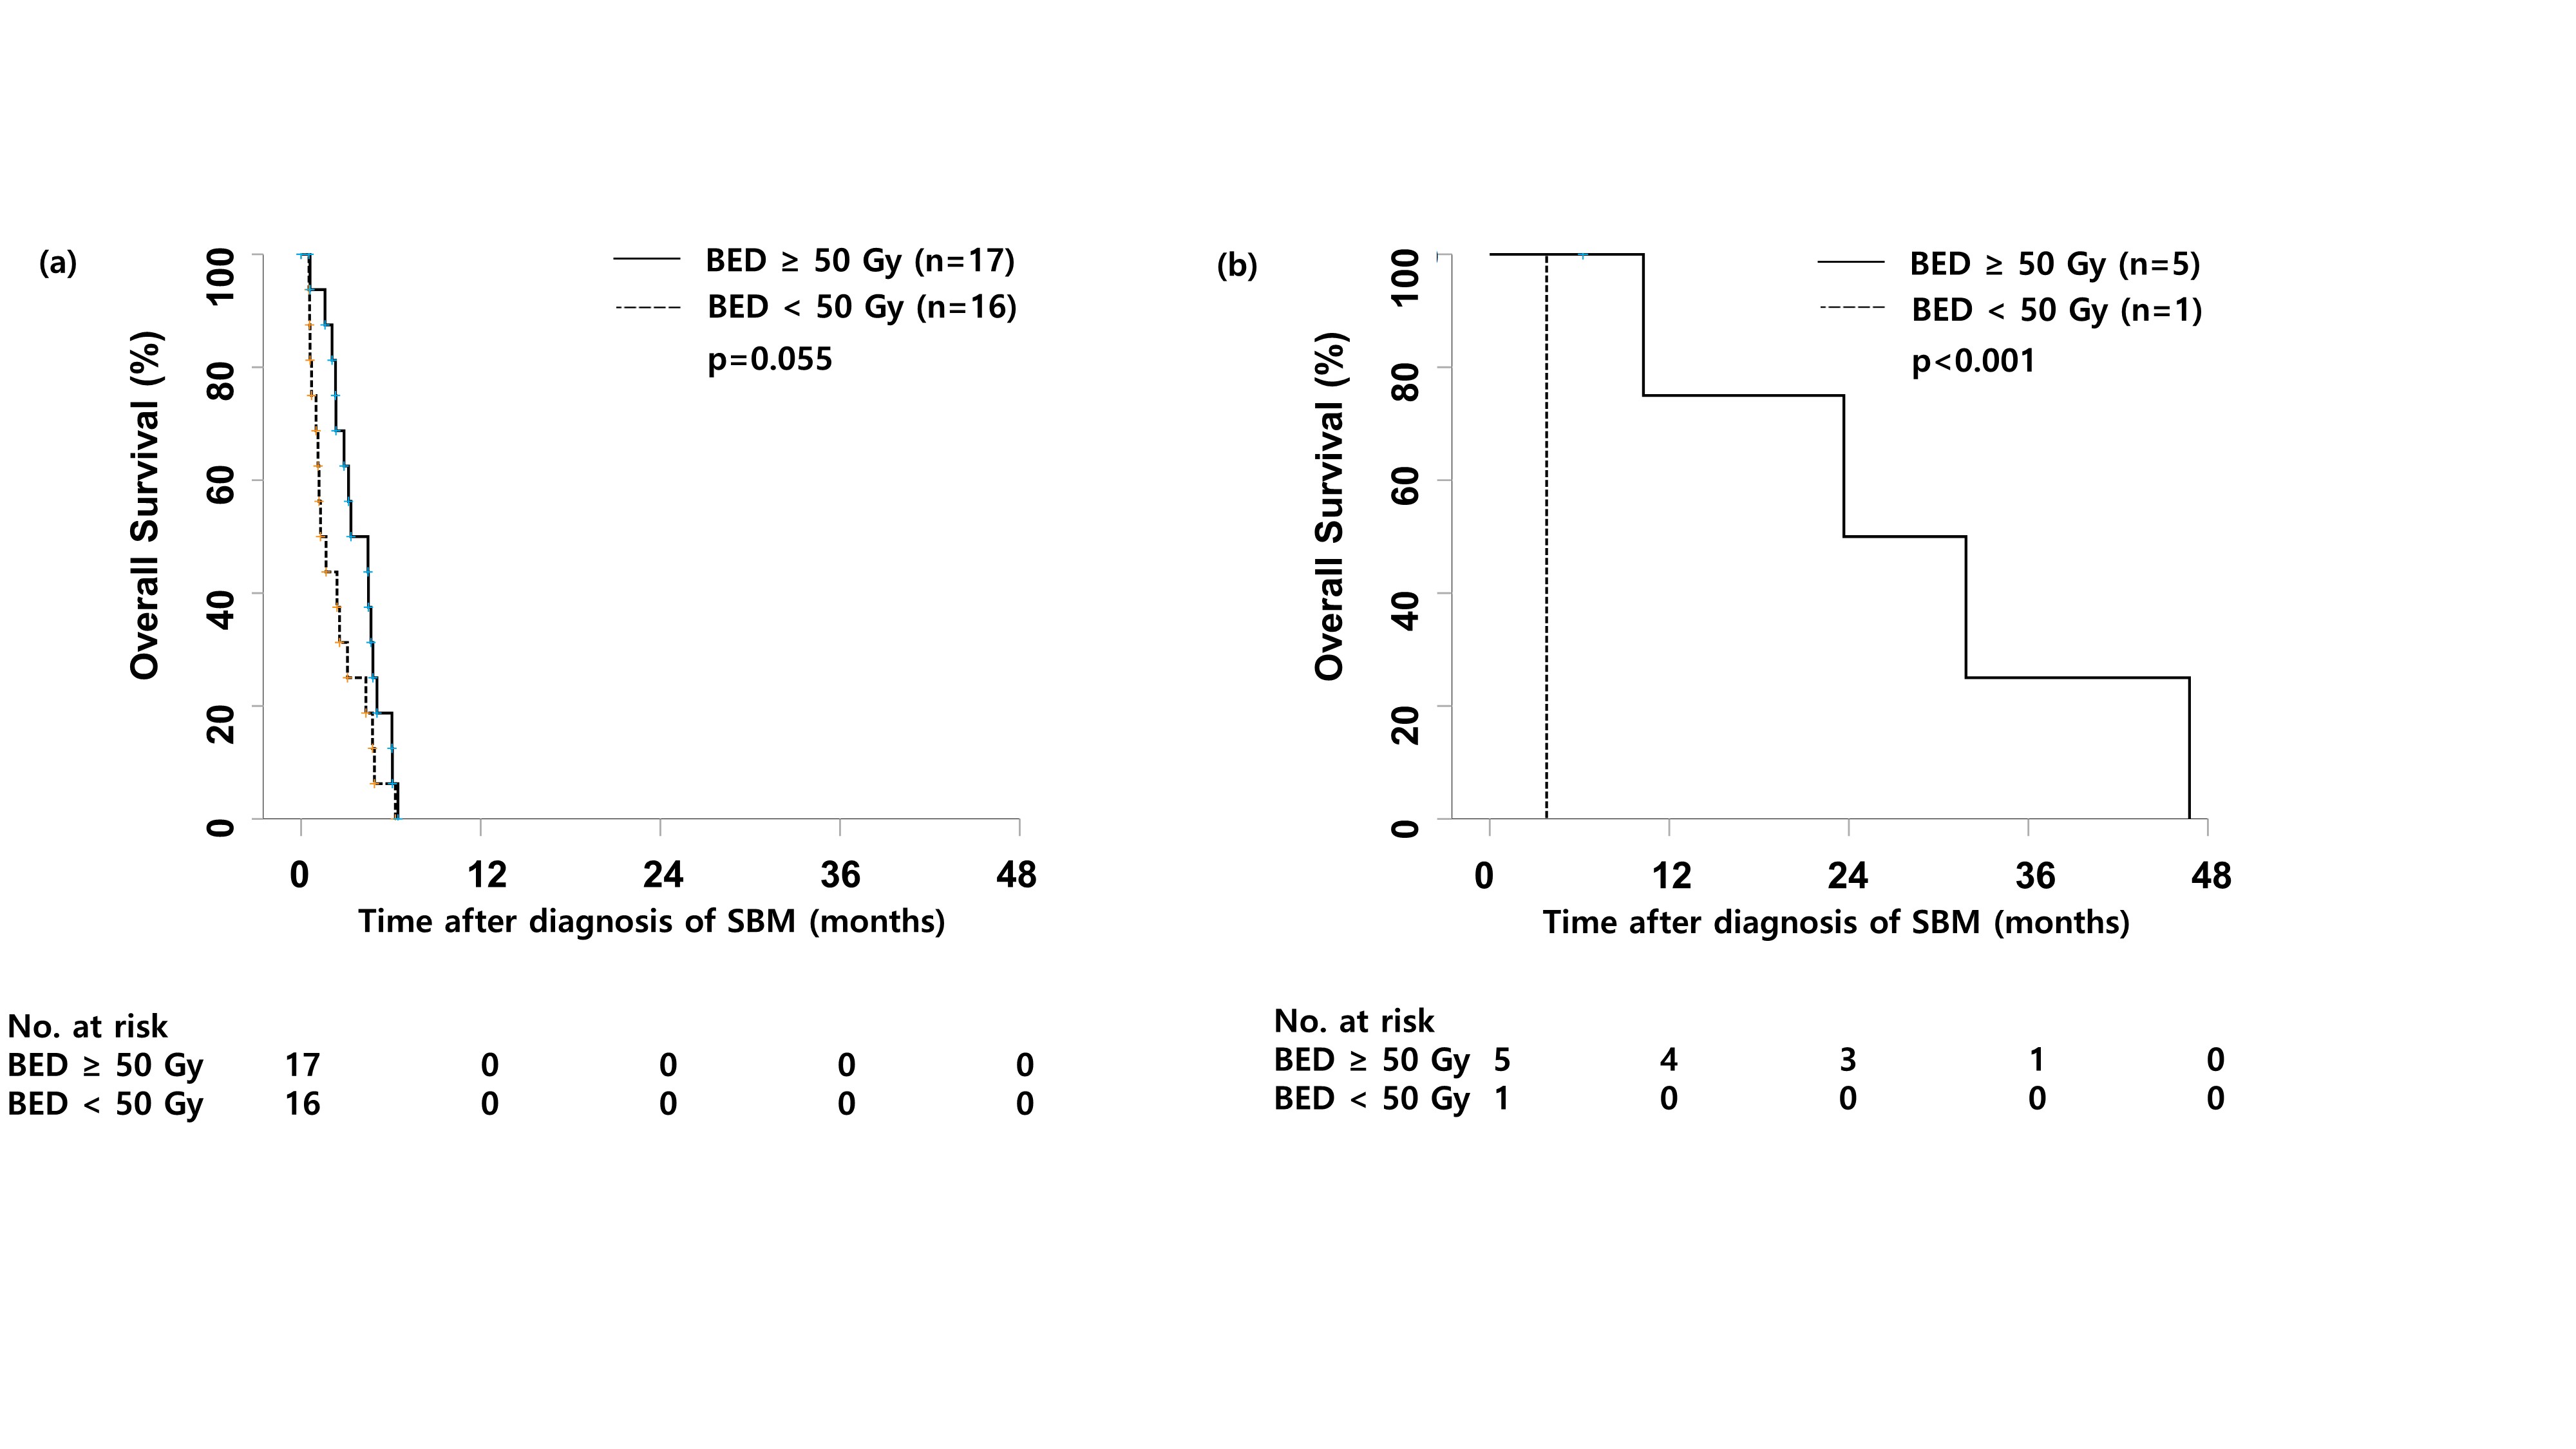


*Abbreviation: BED, biologically effective dose; SBM, skull base metastasis
